# Supplementary material for: Ultra-low lattice thermal conductivity realizing ultra-high performance Bi0.48Sb1.52Te3-based thermoelectric material and module
Source: Royal Society of Chemistry journal article supplement (doi:10.1039/d4ee02008a), 2024-01-01
Supplement: d4ee02008a1.pdf [file d4ee02008a1.pdf]

**Supporting Information:**

**Ultra-low Lattice Thermal Conductivity Realizes Ultra-High Performance**

**Bi<sub>0.48</sub>Sb<sub>1.52</sub>Te<sub>3</sub>-Based Thermoelectric Material and Module**

Hongtao Li, Lidong Chen, Zhe Guo,\* Gang Wu, Xiaojian Tan,\* Qiang Zhang, Jianfeng Cai,  
Qianqian Sun, Jacques G. Noudem, Peng Sun, Jiehua Wu, Guo-Qiang Liu, Jun Jiang\*

H. Li

School of Material Science and Chemical Engineering, Ningbo University

Ningbo 315211, China

H. Li, L. Chen, Dr. Z. Guo, G. Wu, Prof. X. Tan, Dr. Q. Zhang, J. Cai, Q. Sun, P. Sun, Prof.  
J. Wu, Prof. G.-Q. Liu, Prof. J. Jiang

Ningbo Institute of Materials Technology and Engineering, University of Chinese  
Academy of Sciences

Ningbo 315201, China

E-mail: guozhe@nimte.ac.cn, tanxiaojian@nimte.ac.cn, jjun@nimte.ac.cn

L. Chen, Dr. Z. Guo, G. Wu, Prof. X. Tan, Dr. Q. Zhang, J. Cai, Q. Sun, P. Sun, Prof. G.-Q.  
Liu, Prof. J. Jiang

University of Chinese Academy of Sciences

Beijing 100049, China

Prof. J. G. Noudem

Normandie University, ENSICAEN, UNICAEN, CNRS, CRISMAT

Caen 14000, France

## Materials and methods

**Sample Synthesis:** To synthesize the  $\text{Sn}_{1/3}\text{Ge}_{1/3}\text{Pb}_{1/3}\text{Te}$  (SGPT) compound, high-purity (5N) elemental Sn, Ge, Pb, and Te mixture was sealed in an evacuated quartz tube and melted at 800 K for 4 hours and then quenched in cool water for the SGPT single phase ingot. High-purity (5N) elemental Bi, Sb, Cu, Sn, Ge, Pb and Te granules were weighed according to the stoichiometric ratio of  $\text{Bi}_{0.48}\text{Sb}_{1.52}\text{Te}_3$  (BST) +  $x$  wt% SGPT ( $x = 0.30, 0.50$ ) and  $\text{Bi}_{0.48}\text{Sb}_{1.516}\text{Cu}_{0.004}\text{Te}_3$  + 0.50 wt% SGPT ( $y = 0.002, 0.003, 0.004, 0.005$ ), and the mixtures were sealed into  $\varnothing 10$  mm vacuum quartz tubes. The quartz tubes were heated at 1023 K for 1 hours and then rocked for 1 hours, and finally quenched to room temperature in water. The quenched ingots were then ground into powders using a high-speed vibrational ball mill (MSK-SFM-3, China). Finally, the powders were cast into  $\varnothing 20$  mm graphite dies and spark plasma sintered at 693 K under 60 MPa for 5 min.

**Structure Characterization and Measurement:** Powder X-ray diffraction (PXRD, Bruker D8, Germany) was used for characterized the phase compositions of each sample after ball milling with a  $\text{Cu K}\alpha$  ( $\lambda = 1.5406 \text{ \AA}$ ). The microstructures of grains were characterized by electron backscatter diffraction (EBSD) carried out on a scanning electron microscopy (SEM, Quanta FEG 250, FEI). Transmission electron microscopy (TEM, 2100F, Japan) was further applied to analyse the microstructure of the  $\text{Bi}_{0.48}\text{Sb}_{1.516}\text{Cu}_{0.004}\text{Te}_3$  + 0.50 wt% SGPT sample. The bars were cut and polished into the dimension of  $12 \times 3 \times 3 \text{ mm}^3$  to simultaneously measure the electrical conductivity  $\sigma$  and Seebeck coefficient  $S$  using a ZEM-3 apparatus (Ulvac-Riko, Japan). The thin wafers with a size of  $10 \times 10 \times 1 \text{ mm}^3$  were used to determine the thermal diffusion coefficient  $D$  through the laser flash diffusivity method (Netzsch LFA467, Germany). Then, the total thermal conductivity  $\kappa_{\text{tot}}$  was evaluated by the equation  $\kappa_{\text{tot}} = D\rho C_p$ , where density  $\rho$  was determined by Archimedes' method while the specific heat  $C_p$  was obtained by the Dulong–Petit law. The room-temperature Hall coefficients  $R_H$  of all samples were determined using a physical property measurement system (PPMS-9,

Quantum Design, USA). Then the carrier concentration  $n_H$  and mobility  $\mu_H$  were calculated by the formulas  $n_H = 1/(eR_H)$  and  $\mu_H = \sigma R_H$ , respectively.

**TE Module Fabrication and Measurement:** The TE module contains 17 pairs of p-n legs with an overall size of 20 mm × 20 mm. The Ni diffusion barrier layer was prepared by thermal spraying. The Pb-Bi and Sn-Bi based solders were used for the hot side and the cold side, respectively. The module performance was evaluated by a home-built test system, and the energy conversion efficiency  $\eta$  was obtained as  $\eta = P/(Q_c + P) \times 100\%$ , where  $P$  was the measured output power and  $Q_c$  was the measured cold-side heat flow.

**Statistical analysis:** The electronic and thermal transport parameters were assessed using the commercial ZEM-3 and LFA-457 instruments, respectively. The observed results exhibit minimal dependency on sample size, with errors primarily stemming from the standard deviations inherent to these instruments. Notably, the systematic errors associated with the Seebeck coefficient  $S$  and electrical conductivity  $\sigma$  measurements approximate 3% and 5%, respectively. The composite uncertainty for the total thermal conductivity  $\kappa_{tot}$  is estimated at approximately 7%, wherein the contributions are apportioned as 1% for density  $\rho$ , 5% for specific heat  $C_p$ , and 5% for thermal diffusion  $D$ . Consequently, the uncertainty associated with the  $zT$  value is projected to be around 10%. Since the examination of thermal conductivity of Cu has an uncertainty of 5% and the uncertainties of output voltage and current are 0.5%, the uncertainty of conversion efficiency is about 6%, similar to the previous report.<sup>1</sup>

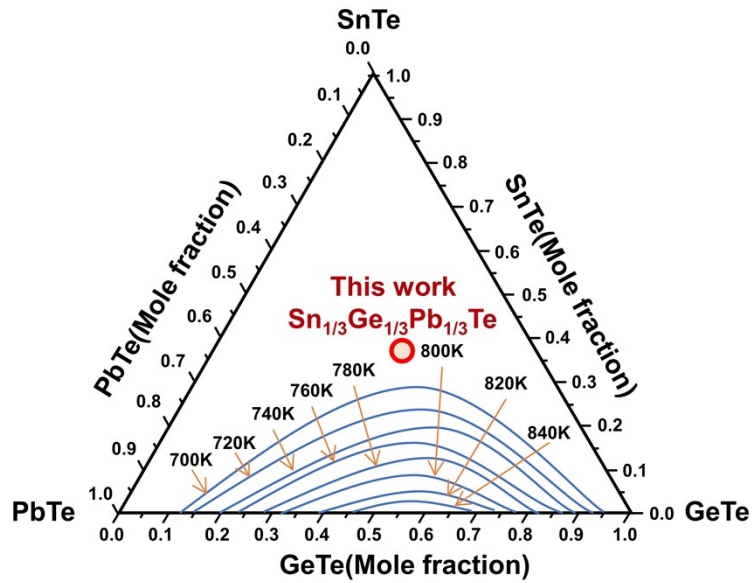

**Figure S1.** Phase diagrams for SnTe-PbTe-GeTe at various isotherms<sup>2</sup>

**Structure model of the  $\text{Sn}_{1/3}\text{Ge}_{1/3}\text{Pb}_{1/3}\text{Te}$  and  $\text{Bi}_{0.48}\text{Sb}_{1.52}\text{Te}_3$**

SGPT possesses a cubic crystal structure with a space group of  $Pm\bar{3}m$ . Compounds are formed by replacing the vacancies of Ge atoms with Sn or Pb. The corresponding schematic diagrams of composites of SGPT and BST are depicted in Figure S2.

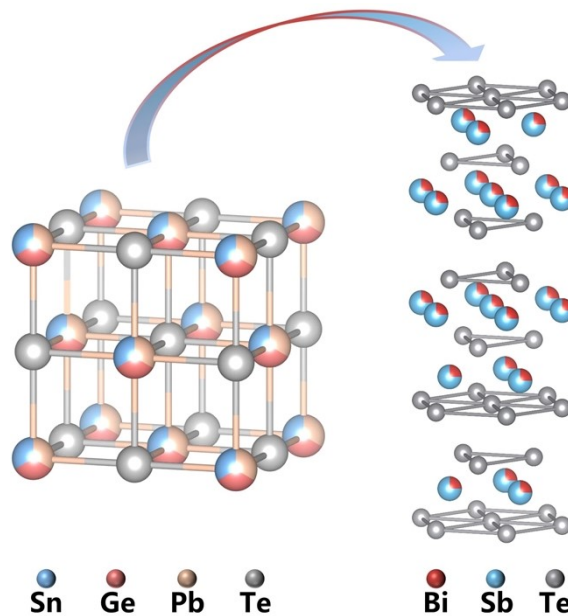

**Figure S2.** Schematic diagram of the crystal structure of SGPT and BST.

**Table S1.** The XRD refinement results for lattice parameters of BST and  $\text{Bi}_{0.48}\text{Sb}_{1.516}\text{Cu}_{0.004}\text{Te}_3$  + 0.50 wt % SGPT representative samples.

| <i>Samples</i> |       | $x=0.0, y=0.0$ | $x=0.50, y=0.004$ |
|----------------|-------|----------------|-------------------|
| Lattice        | $a/b$ | 4.29482        | 4.28885           |
| Parameters(Å)  | $c$   | 30.43123       | 30.47123          |

At the melting temperature of BST, SGPT exhibits marginal stability, whereby crystal decomposition may prompt the substitution of Cu (1.17 Å), Sn (1.40 Å), Ge (0.53 Å), or Pb (1.19 Å) for Sb (1.41 Å) or Bi (1.46 Å). This substitution leads to a slight reduction in the lattice parameters along the a- and b-axes, while the c-axis experiences a slight increase, possibly due to partial occupancy of copper atoms in van der Waals interlayer positions. The variations in lattice constants suggest successful doping of SGPT and copper into BST, forming a stable solid solution.

### Calculated The calculation of orientation factor $F$

The calculation of the orientation factor ( $F$ ), which serves as an indicator of the degree of orientation in layered-structural samples, is conducted using the Lotgering method. It is expressed by the following equation:<sup>3</sup>

$$F = \frac{P - P_0}{1 - P_0}$$
$$P = \frac{\sum I(00l)}{\sum I(hkl)}$$
$$P_0 = \frac{\sum I_0(00l)}{\sum I_0(hkl)}$$

Here,  $\sum I(00l)$  represents the total intensity of all  $(00l)$  planes' diffraction peaks,  $\sum I(hkl)$  represents the total intensity of all  $(hkl)$  diffraction peaks, and  $P$  is the ratio of  $(00l)$  plane intensity to the total intensity in the measured data. Similarly,  $\sum I_0(00l)$ ,  $\sum I_0(hkl)$ , and  $P_0$  denote the corresponding parts of the standard powder diffraction file. In the X-ray patterns of incompletely oriented materials, the  $(hkl)$  reflections persist, and the ratio of the intensity of the  $(00l)$  and  $(hkl)$  reflections increases with stronger orientation. The orientation factor ranges from 0 to 1, signifying the extent of orientation, from no preferred orientation to complete orientation.

The calculated orientation factors  $F_{00l}$  for a series of samples are tabulated below. Notably, samples fabricated through ball milling and spark plasma sintering methods exhibit markedly low  $F_{00l}$  values, ranging from 0.045 to 0.070.

**Table S2.** Orientation factors  $F_{00l}$  for the  $\text{Bi}_{0.48}\text{Sb}_{1.52-y}\text{Cu}_y\text{Te}_3 + x \text{ wt\%SGPT}$  samples at room temperature.

| $x/y$      | $F_{00l}$ |
|------------|-----------|
| 0/0        | 0.05623   |
| 0.30/0     | 0.06864   |
| 0.50/0     | 0.06969   |
| 0.50/0.002 | 0.05684   |
| 0.50/0.003 | 0.06774   |
| 0.50/0.004 | 0.06993   |
| 0.50/0.004 | 0.06328   |

TEM characterizations of  $\text{Bi}_{0.48}\text{Sb}_{1.516}\text{Cu}_{0.004}\text{Te}_3 + 0.50 \text{ wt\%SGPT}$  sample

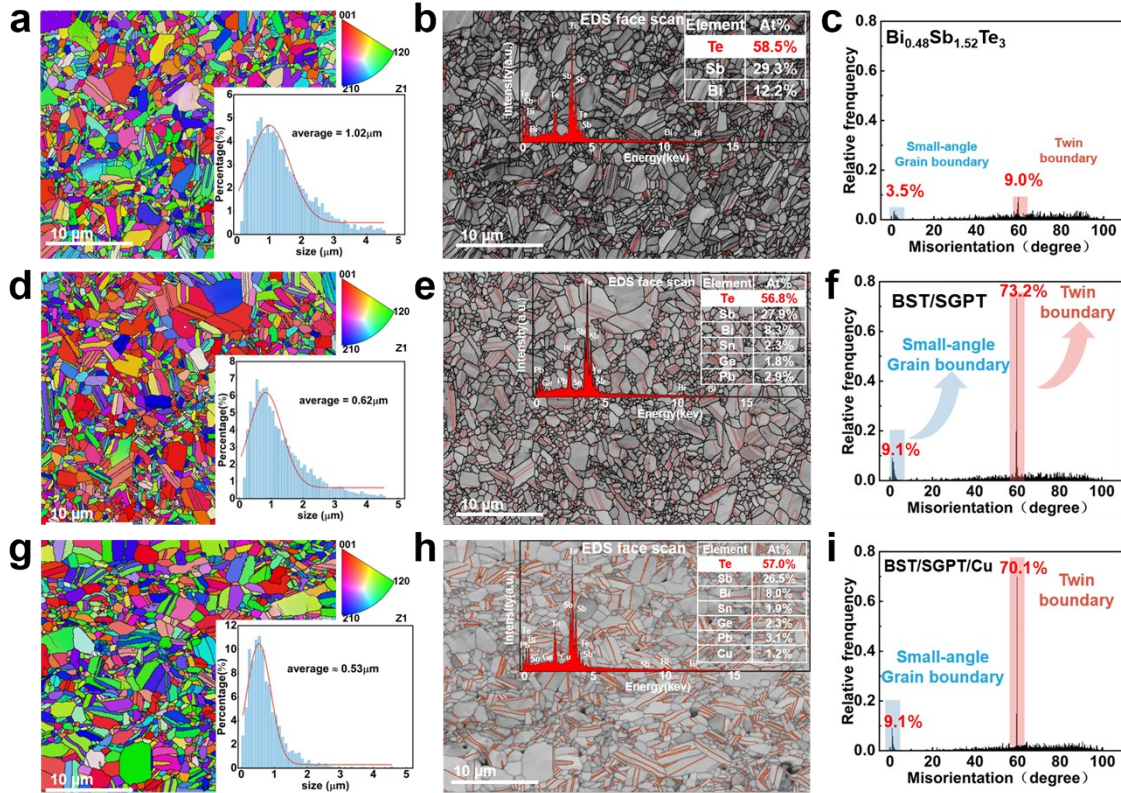

**Figure S3.** a), d), and g) The inverse pole figure and grain size distribution, b), e), and h) Kikuchi band contrast map (the red line indicates the twin boundaries at  $60^\circ$ ) and the corresponding EDS elemental mappings (face scan), c), f), and i) grain boundary misorientation distribution for BST,  $\text{Bi}_{0.48}\text{Sb}_{1.52}\text{Te}_3 + 0.50 \text{ wt\%SGPT}$  and  $\text{Bi}_{0.48}\text{Sb}_{1.516}\text{Cu}_{0.004}\text{Te}_3 + 0.50 \text{ wt\%SGPT}$  samples.



Geometric phase analysis: This method involves aligning the x direction with the (110) crystal plane and ensuring that the y direction is perpendicular to the (110) crystal plane. In this context,  $\epsilon_{xx}$  and  $\epsilon_{yy}$  represent the normal strains in the x and y directions, respectively, while  $\epsilon_{yy}$  and  $\Delta_{xy}$  indicate the shear strains in the xy and yx directions, respectively.

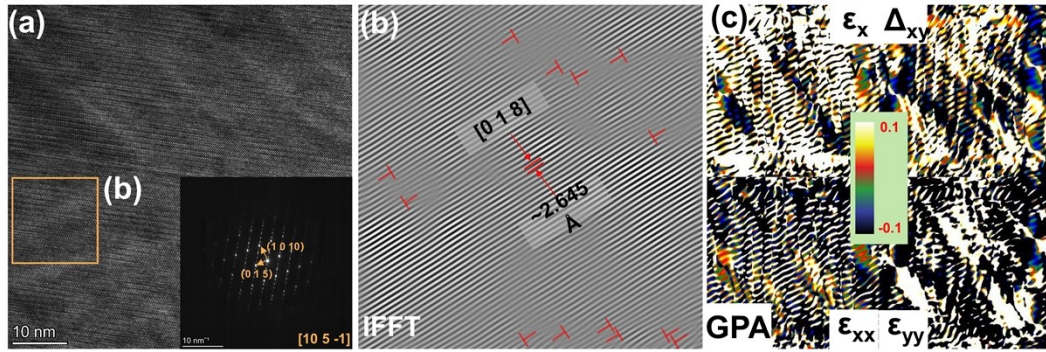

**Figure S4.** TEM images for the  $\text{Bi}_{0.48}\text{Sb}_{1.516}\text{Cu}_{0.004}\text{Te}_3 + 0.50 \text{ wt\%SGPT}$  sample. (a) High-resolution TEM image of  $\text{Bi}_{0.48}\text{Sb}_{1.516}\text{Cu}_{0.004}\text{Te}_3 + 0.50 \text{ wt\%SGPT}$  matrix and SAED patterns along [10 5 -1] zone axis, (b) IFFT image of “Area b” in (a), and (c) GPA image of the area corresponding to “Area b”.

### Calculation of $\kappa_{\text{ph}}$ and $\kappa_{\text{bip}}$

Disregarding the bipolar effect at lower temperatures, the value of  $\kappa_{\text{ph}} + \kappa_{\text{bip}}$  is approximately equal to the value of  $\kappa_{\text{ph}}$ . The  $\kappa_{\text{ph}}$  data around 300 K can be fitted with the expression  $\kappa_{\text{ph}} = aT^{-1} + b$ , where  $a$  and  $b$  are the fitting parameters. Then the fitted  $\kappa_{\text{ph}}$  is obtained by extrapolating the equation to 500 K. Finally, the fitted  $\kappa_{\text{ph}}$  and calculated  $\kappa_{\text{e}}$  are subtracted from the measured  $\kappa_{\text{tot}}$  to obtain the  $\kappa_{\text{bip}}$  values for all samples between 300~500 K.

**Table S3.** Fitting parameters for all the  $\text{Bi}_{0.48}\text{Sb}_{1.52-y}\text{Cu}_y\text{Te}_3 + x \text{ wt\%SGPT}$  samples by using the expression of  $\kappa_{\text{ph}} = aT^{-1} + b$ .

| $x/y$      | $a$      | $b$     |
|------------|----------|---------|
| 0/0        | 24.45786 | 0.56952 |
| 0.30/0     | 28.19879 | 0.50638 |
| 0.50/0     | 33.72441 | 0.42063 |
| 0.50/0.002 | 67.24948 | 0.30066 |
| 0.50/0.003 | 81.38919 | 0.24556 |
| 0.50/0.004 | 75.75550 | 0.17605 |
| 0.50/0.004 | 99.44537 | 0.09810 |

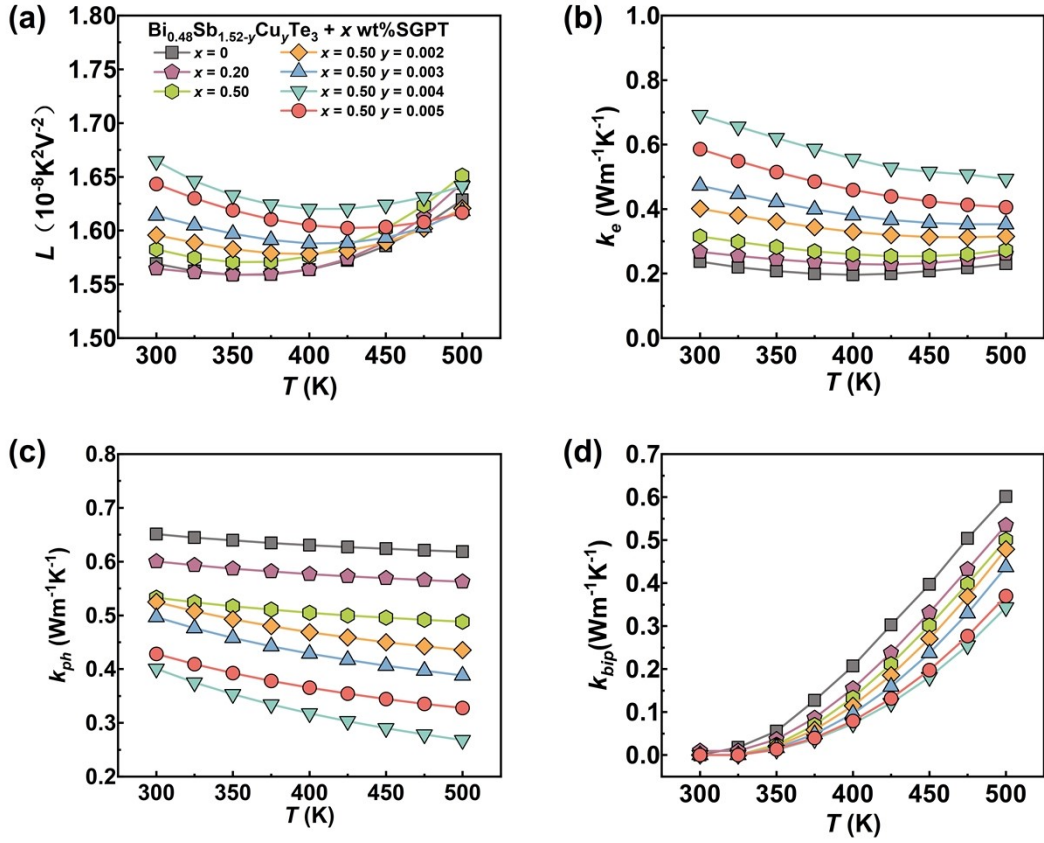

**Figure S5.** Thermal transport properties for  $\text{Bi}_{0.48}\text{Sb}_{1.52-y}\text{Cu}_y\text{Te}_3 + x \text{ wt\% SGPT}$  ( $x=0.30, 0.50, y=0.002, 0.003, 0.004, 0.005$ ) samples: (a) Calculated Lorenz number  $L$  for  $\text{Bi}_{0.48}\text{Sb}_{1.52-y}\text{Cu}_y\text{Te}_3 + x \text{ wt\% SGPT}$ , and (b) electronic thermal conductivity  $\kappa_e$ , (c) lattice thermal conductivity  $\kappa_{ph}$ , and (d) bipolar thermal conductivity  $\kappa_{bip}$ .

## Single parabolic band model

The electronic transport properties of thermoelectric semiconductors can be well simulated by the single parabolic band model. The Seebeck coefficient can be described as:<sup>4,5</sup>

$$S = \frac{k_B}{e} \left[ \frac{(r + 5/2)F_{(r+3/2)}(\eta)}{(r + 3/2)F_{(r+1/2)}(\eta)} - \eta \right] \quad (S2)$$

where the scattering factor  $r$  is  $-1/2$  when the charge carriers are mainly scattered by acoustic phonons;  $\eta$  is the reduced Fermi energy  $\eta = \frac{E_f}{k_B T}$  and  $F_i(\eta) = \int_0^\infty \frac{x^i}{1 + e^{x-\eta}} dx$  is the  $i$ th order Fermi integral. By fitting the experimental results of Seebeck coefficient versus carrier concentration  $n$ , the corresponding reduced Fermi energy  $\eta$  is obtained, and then the density of state effective mass can be evaluated as:

$$m_d^* = \frac{h^2}{2k_B T} \left[ \frac{nr_H}{4\pi F_{1/2}(\eta)} \right]^{2/3} \quad (S3)$$

Then, the Hall carrier concentration and Hall factor are expressed as:

$$n = \frac{1}{eR_H} = \frac{8\pi(2m_d^*k_B T)^{3/2}}{3h^3} \frac{(r + 3/2)^2 F_{(r+1/2)}^2(\eta)}{(2r + 3/2)F_{(2r+1/2)}(\eta)} \quad (S4)$$

$$r_H = \frac{3(2r + 3/2)F_{1/2}(\eta)F_{(2r+1/2)}(\eta)}{2(r + 3/2)^2 F_{(r+1/2)}^2(\eta)} \quad (S5)$$

Moreover, the deformation potential parameter is determined by:

$$E_{def}^2 = \frac{\sqrt{2}\pi(h/2\pi)^4 e\rho v_L^2}{3(m_d^*)^{5/2}(k_B T)^{3/2} F_{1/2}(\eta)\mu_H} r_H \quad (S6)$$

where  $C_1$  is the elastic constant for longitudinal vibrations,  $\rho$  is density, and  $v_L$  is the longitudinal velocity of sound. Based on the above equations, the Hall mobility is evaluated as:

$$\mu_H = \left[ \frac{e\pi h^4}{\sqrt{2}(k_B T)^{3/2} E_{def}^2 (m_d^*)^{5/2}} \right] \frac{C_1}{(r + 3/2)^2 F_{(r+1/2)}(\eta)} \frac{(2r + 3/2)F_{(2r+1/2)}(\eta)}{(r + 3/2)^2 F_{(r+1/2)}(\eta)} \quad (S7)$$

## Debye-Callaway model

According to the Debye-Callaway model, the lattice thermal conductivity with doping or alloying can be calculated with the following equation,

$$\kappa_{ph} = \frac{k_B}{2\pi^2 v} \left( \frac{k_B T}{\hbar} \right)^3 \int_0^{\theta_D/T} \tau_{tot}(x) \frac{x^4 e^x}{(e^x - 1)^2} dx$$

The integrand item in conjunction with the coefficient of Eq.(S7) is the spectral lattice thermal conductivity ( $\kappa_s$ ), namely,

$$\kappa_s = \frac{k_B}{2\pi^2 v} \left( \frac{k_B T}{\hbar} \right)^3 \tau_{tot}(x) \frac{x^4 e^x}{(e^x - 1)^2}$$

where  $x = \hbar\omega/k_B T$  ( $\omega$  denoting the phonon frequency) is the reduced phonon frequency,  $\hbar$  is the reduced Plank constant,  $k_B$  is the Boltzmann constant,  $v$  is average sound speed,  $\vartheta_D$  is the Debye temperature.  $\tau_{tot}$  is the total relaxation time and can be evaluated via the Matthiessen's rule. Here, we mainly consider phonon-phonon Umklapp scattering (U), grain boundary scattering (B), point defect scattering (PD), nano-precipitates scattering (NP), and stacking faults scattering (SF),

$$\tau_{tot}^{-1} = \tau_U^{-1} + \tau_B^{-1} + \tau_{PD}^{-1} + \tau_{NP}^{-1} + \tau_{SF}^{-1}$$

The Umklapp phonon-phonon scattering (U),

$$\tau_U^{-1} = A_N \frac{2}{(6\pi^2)^{1/3}} \frac{k_B \bar{V}^{1/3} \gamma^2 \omega^2 T}{M v^3}$$

where  $A_N$  is the prefactor of Umklapp scattering time,  $\bar{V}$  is the average atomic volume,  $\gamma$  is the Grüneisen parameter,  $M$  is the average atomic mass.

The grain boundary phonon scattering (B),

$$\tau_B^{-1} = \frac{v}{d}$$

where  $d$  is the average grain size.

The point defect phonon scattering (PD),

$$\tau_{PD}^{-1} = \frac{k_B^4 \bar{V}}{4\pi \hbar^4 v^3} \Gamma x^4 T^4 \quad \text{and} \quad \Gamma = \sum_i f_i \left( \frac{\bar{m} - m_i}{\bar{m}} \right)^2$$

where  $\Gamma$  is the point defect scattering parameter and determined by the mass difference.

The nano precipitates phonon scattering (NP),

$$\tau_{NP}^{-1} = v \left[ (2\pi R^2)^{-1} + \left( \frac{4}{9} \pi R^2 (\Delta D/D)^2 (\omega R/v)^4 \right)^{-1} \right]^{-1} N_p$$

where  $R$  is the average radius for the precipitates,  $\Delta D$  is density difference between the precipitate and matrix,  $D$  is the matrix density,  $N_p$  is the number density of precipitates.

The stacking faults phonon scattering (SF),

$$\tau_{SF}^{-1} = 0.7 \frac{a^2}{v} \gamma^2 \omega^2 N_s$$

where  $a$  is the lattice parameter, and  $N_s$  is the number of stacking faults crossing a line of unit length. The parameters required for the Debye-Callaway model are summarized in Table S4.

**Table S4.** Parameters for calculating  $\kappa_{ph}$  of the  $\text{Bi}_{0.48}\text{Sb}_{1.516}\text{Cu}_{0.004}\text{Te}_3+0.50$  wt%SGPT sample in the Debye-Callaway model.

| Parameters    | Descriptions                                                                                              | Values                                 | Ref    |
|---------------|-----------------------------------------------------------------------------------------------------------|----------------------------------------|--------|
| $\nu$         | In-plane average speed of sound                                                                           | 2147 m s <sup>-1</sup>                 | 6      |
| $\vartheta_D$ | Debye temperature                                                                                         | 94K                                    | 7      |
| $V$           | Average atomic volume                                                                                     | 31.26 Å <sup>3</sup>                   | 6      |
| $\gamma$      | Grüneisen parameter                                                                                       | 2.33                                   | 8      |
| $B_D$         | Effective Burger's vecto                                                                                  | 1.2×10 <sup>-19</sup> m                | fitted |
| $\nu_L$       | Longitudinal sound velocity                                                                               | 2884 m s <sup>-1</sup>                 | 9      |
| $\nu_T$       | Transverse sound velocity                                                                                 | 1780 m s <sup>-1</sup>                 | 7      |
| $V_{BT}$      | Atomic volume of Bi <sub>2</sub> Te <sub>3</sub>                                                          | 3.40×10 <sup>-29</sup> m <sup>3</sup>  | 10     |
| $V_{ST}$      | Atomic volume of Sb <sub>2</sub> Te <sub>3</sub>                                                          | 3.31×10 <sup>-29</sup> m <sup>3</sup>  | 8      |
| $M_{BT}$      | Atomic mass of Bi <sub>2</sub> Te <sub>3</sub>                                                            | 2.79×10 <sup>-25</sup> kg              | 7      |
| $M_{ST}$      | Atomic mass of Sb <sub>2</sub> Te <sub>3</sub>                                                            | 2.07×10 <sup>-25</sup> kg              | 7      |
| $C_0$         | Concentration of Bi <sub>0.48</sub> Sb <sub>1.52</sub> Te <sub>3</sub> in Bi <sub>2</sub> Te <sub>3</sub> | 0.25                                   | 11     |
| $K$           | Bulk modulus                                                                                              | 44.8 GPa                               | 7      |
| $T_a$         | Sintering temperature                                                                                     | 693 K                                  | Exp.   |
| $d$           | Grain size                                                                                                | 2×10 <sup>-6</sup> m                   | Exp.   |
| $r$           | Poisson's ratio                                                                                           | 2.33                                   | 12     |
| $N_d$         | Dislocation density                                                                                       | 3.33×10 <sup>14</sup> cm <sup>-2</sup> | Exp.   |
| $\Gamma$      | Point defect scattering parameter                                                                         | 0.23                                   | Exp.   |
| $R$           | Average radius of second phase                                                                            | 20 nm                                  | Exp.   |
| $N_p$         | Number density of Second phase                                                                            | 7.33×10 <sup>19</sup> m <sup>3</sup>   | Exp.   |
| $D$           | Density of matrix                                                                                         | 6.65 g/cm <sup>3</sup>                 | Exp.   |

### The calculation of average $zT$

Given the inherent temperature dependence of thermoelectric parameters, assessing the thermoelectric properties of materials within a specific temperature range through computation of the average  $zT$  ( $zT_{avg}$ ) is imperative. The formula for calculating  $zT_{avg}$  is as follows:

$$zT_{avg} = \frac{\int_{T_c}^{T_h} zT dT}{T_h - T_c}$$

Where  $T_h$ ,  $T_c$  are the hot-side and cold-side temperatures, respectively.



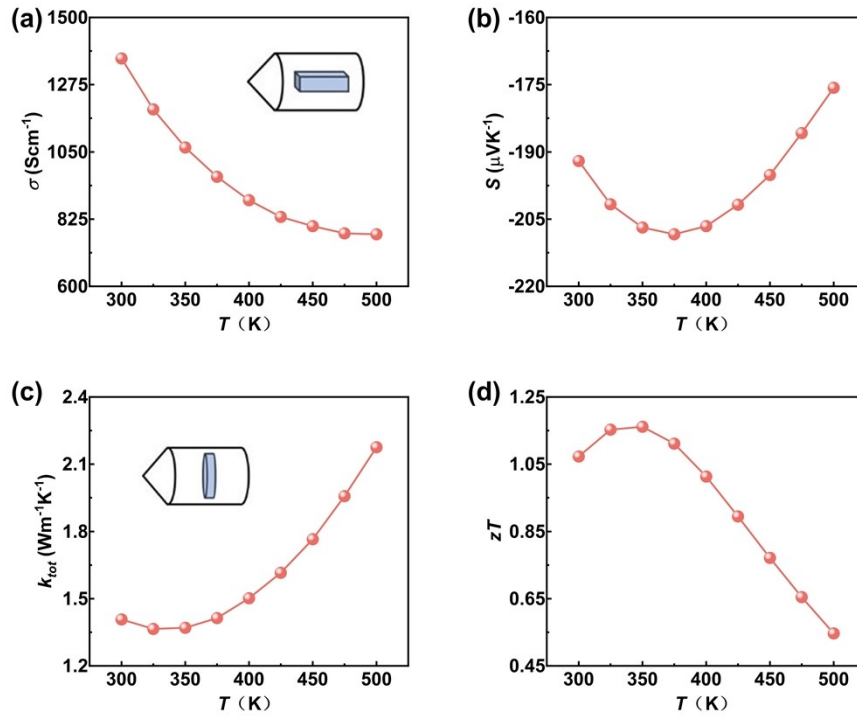

**Figure S6.** Temperature dependence of (a) electrical conductivity, (b) Seebeck coefficient, (c) total thermal conductivity, and (d)  $zT$  value for previously reported zone-melted  $\text{Bi}_2\text{Te}_{2.7}\text{Se}_{0.3}$  materials used to assemble the thermoelectric module. The orientation of the test samples in the ingot is shown in figures (a) and (c).

## Homemade test system diagram

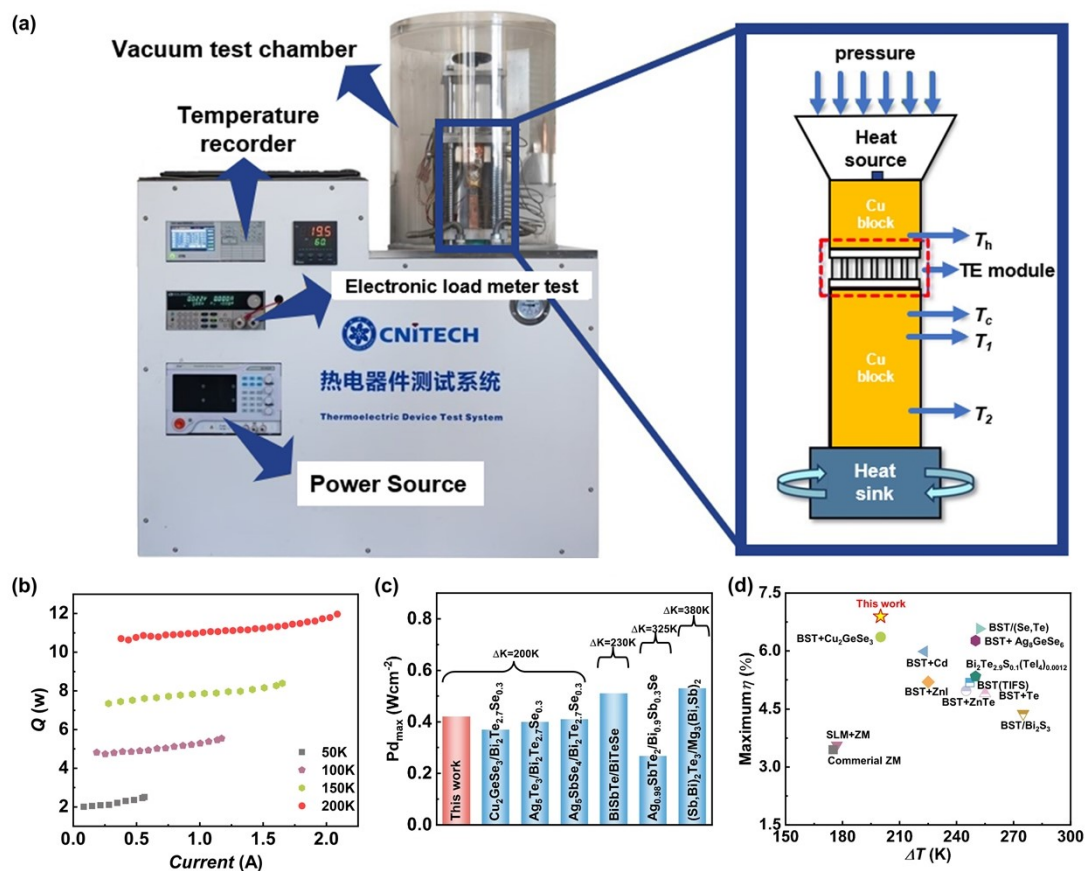

**Figure S7.** (a) Homemade test system diagram. (b) The measured heat flow  $Q$  of the fabricated thermoelectric module. (c) The comparison of power density of Bi<sub>0.48</sub>Sb<sub>1.516</sub>Cu<sub>0.004</sub>Te<sub>3</sub> + 0.50 wt% SGPT /Bi<sub>2</sub>Te<sub>2.7</sub>Se<sub>0.3</sub> module, and (d) the maximum conversion efficiency of the fabricated TE module compared with previously reported Bi<sub>2</sub>Te<sub>3</sub>-based TE modules.

## References:

- <sup>1</sup> L. Yin, X. Li, X. Bao, J. Cheng, C. Chen, Z. Zhang, X. Liu, F. Cao, J. Mao, Q. Zhang, *Nat. Commun.* 2024, **15**, 1468.
- <sup>2</sup> J. Tang, Z. Yao, Y. Wu, S. Lin, F. Xiong, W. Li, Y. Chen, T. Zhu and Y. Pei, *Mater. Today Phys.*, 2020, **15**, 100247.
- <sup>3</sup> K. Pang, L. Miao, Q. Zhang, Q. Pan, Y. Liu, H. Shi, J. Li, W. Zhou, Z. Zhang, Y. Zhang, G. Wu, X. Tan, J. G. Noudem, J. Wu, P. Sun, H. Hu, G. Liu and J. Jiang, *Adv. Funct. Mater.*, 2024, 2315591.
- <sup>4</sup> J. Zhu, X. Zhang, M. Guo, J. Li, J. Hu, S. Cai, W. Cai, Y. Zhang and J. Sui, *NPJ Comput. Mater.*, 2021, **7**, 116.
- <sup>5</sup> J. Shen, X. Zhang, Z. Chen, S. Lin, J. Li, W. Li, S. Li, Y. Chen and Y. Pei, *J. Mater. Chem. A*, 2017, **5**, 5314–5320.
- <sup>6</sup> V. A. Kulbashinskii, V. G. Kytin, N. V. Maslov, P. Singha, S. Das, A. K. Deb and A. Banerjee, *Mater. Today: Proc.*, 2019, **8**, 573–581.
- <sup>7</sup> K. Pang, M. Yuan, Q. Zhang, Y. Li, Y. Zhang, W. Zhou, G. Wu, X. Tan, J. G. Noudem, C. Cui, H. Hu, J. Wu, P. Sun, G. Liu and J. Jiang, *Small*, 2023, **6**, 2306701.
- <sup>8</sup> Q. Zhang, M. Yuan, K. Pang, Y. Zhang, R. Wang, X. Tan, G. Wu, H. Hu, J. Wu, P. Sun, G. Liu and J. Jiang, *Adv. Mater.*, 2023, **35**, 2300338.
- <sup>9</sup> P. F. Rosen and B. F. Woodfield, *J. Chem. Thermodyn.*, 2020, **141**, 105974.
- <sup>10</sup> E. S. Toberer, A. Zevalkink and G. J. Snyder, *J. Mater. Chem.*, 2011, **21**, 15843–15852.
- <sup>11</sup> T. Ikeda, *Materia Japan*, 2014, **53**, 307–311.
- <sup>12</sup> X. Chen, H. D. Zhou, A. Kiswandhi, I. Miotkowski, Y. P. Chen, P. A. Sharma, A. L. Lima Sharma, M. A. Hekmaty, D. Smirnov and Z. Jiang, *Appl. Phys. Lett.*, 2011, **99**, 261912.
